# Supplementary material for: Compositional engineering of ZnBr2-doped CsPbBr3 perovskite nanocrystals: insights into structure transformation, optical performance, and charge-carrier dynamics
Source: Royal Society of Chemistry journal article supplement (doi:10.1039/d3tc02179c), 2023-01-01
Supplement: d3tc02179c1.pdf [file d3tc02179c1.pdf]

## Electronic Supplementary Information

### Compositional engineering of ZnBr<sub>2</sub>-doped CsPbBr<sub>3</sub> perovskite nanocrystals: Insights into structure transformation, optical performance, and charge-carrier dynamics

V. Naresh <sup>a</sup>, Kiran Gupta <sup>b</sup>, Kyunghoon Lee <sup>c</sup>, Jiwoong Yang <sup>c</sup>, Pil-Ryung Cha<sup>\*,a</sup>, Nohyun Lee<sup>\*,a</sup>

<sup>a</sup>School of Advanced Material Engineering, Kookmin University, Seoul 02707, Republic of Korea.

<sup>b</sup>Department of Chemical Engineering, Kyung Hee University, 1732 Deogyeong-daero, Giheung-gu, Yongin, Gyeonggi-do 17104, Republic of Korea.

<sup>c</sup>Department of Energy Science and Engineering, Daegu Gyeongbuk Institute of Science and Technology (DGIST), Daegu 42988, Republic of Korea.

\*Corresponding author email: [cprdream@kookmin.ac.kr](mailto:cprdream@kookmin.ac.kr) (Pil-Ryung Cha),  
[nohyunlee@kookmin.ac.kr](mailto:nohyunlee@kookmin.ac.kr) (Nohyun Lee)

#### Materials and chemicals:

Lead bromide (PbBr<sub>2</sub>, 99.99% Sigma-Aldrich), cesium carbonate (Cs<sub>2</sub>CO<sub>3</sub>, 99.99% Sigma-Aldrich), zinc bromide (ZnBr<sub>2</sub>, 99.99% Sigma-Aldrich), 1-octadecene (ODE, 90% Sigma-Aldrich), oleic acid (OA, 90% Sigma-Aldrich), oleylamine (OLA, 80-90% Sigma-Aldrich), Methyl acetate (MeOAc, 99.5% Sigma-Aldrich), n-hexane (95.0% Samchun), toluene (99.99% Samchun) and Polystyrene (PS, Mw: ~350,000 by GPC, Sigma-Aldrich) were purchased and used without further purification.

#### Synthesis methodology:

**Preparation of caesium-oleate:** Cs<sub>2</sub>CO<sub>3</sub> (0.4073 g, 1.25 mmol), 15 mL ODE, and 1.35 mL OA were loaded into a 100 mL 3-neck flask, heated to 120 °C under vacuum for 1 h, and then heated under Ar gas flow at 150 °C until Cs<sub>2</sub>CO<sub>3</sub> was completely dissolved, and a clear solution was obtained. The Cs-oleate solution is kept at this temperature (150 °C) before

it was injected.

**Synthesis of CsPbBr<sub>3</sub> perovskite NCs:** PbBr<sub>2</sub> (0.138 g, 0.376 mmol) and ODE (10 mL) were loaded into a 50 mL 3-neck flask, heated to 120 °C under vacuum for 1 hr, and then followed by heating the solution to 150 °C under Ar gas. Dried OA and OAm (each 1 mL) at 100 °C were injected into the PbBr<sub>2</sub>-ODE solution at 120 °C under the flow of Ar gas. After complete solubilization of PbBr<sub>2</sub> salt, the temperature was raised to 160-170 °C and kept at this temperature for 5 minutes. Then, Cs-oleate solution (0.85 mL) was swiftly injected into the PbBr<sub>2</sub>-ODE solution, and after 60 s the solution was immediately cooled down to room temperature by immersing the flask in an ice-water bath.

**Synthesis of ZnBr<sub>2</sub>-doped CsPbCl<sub>3</sub> perovskite NCs:** The procedure described above was followed for the synthesis of ZnBr<sub>2</sub>-doped CsPbCl<sub>3</sub> perovskite PNCs. In this procedure, A specific amount of and 0%, 20%, 40%, 60%, 80% ZnBr<sub>2</sub> were added to the PbBr<sub>2</sub>, and ODE (10 mL) were loaded into a 50 mL 3-neck flask and heated to 120 °C under vacuum for 1 h and then followed by heating the solution to 150 °C under Ar gas. Dried OA and OAm (each 1 mL) at 100 °C were injected into the PbBr<sub>2</sub>-ODE solution at 120 °C under the flow of Ar gas. After complete solubilization of PbBr<sub>2</sub> salt, the temperature was raised to 175-180 °C and kept at this temperature for 5 minutes. Then, Cs-oleate solution (0.85 mL) was swiftly injected into the PbBr<sub>2</sub>-ZnBr<sub>2</sub>-ODE solution, and after 60 s the solution was immediately cooled down to room temperature by immersing the flask in an ice-water bath.

**Purification of nanocrystals:** As-synthesized CsPbBr<sub>3</sub> and ZnBr<sub>2</sub>-doped CsPbBr<sub>3</sub> PNCs were extracted from the crude solution by centrifuging at 8000 rpm for 5 min and then discard the supernatant. This process was repeated for one more time by adding 4 ml MeOAc and centrifuging to remove the residual mixture. Then, the precipitate was redispersed in 2 ml MeOAc and 2 ml n-hexane and centrifuged again for 5 min at 8000 rpm, and the supernatant

was discarded. Subsequently, the particles in the centrifuge tube were dispersed again in 5 ml n-hexane and centrifuged for 5 min at 5000 rpm supernatant was discarded. Finally, the precipitate was re-dispersed in toluene (or n-hexane for optical characterization) forming stable colloidal solutions. For solid NCs powders, the precipitate obtained in the above step was dried under a vacuum at 60 °C overnight.

**Synthesis of  $\text{K}_2\text{SiF}_6\text{:Mn}^{4+}$  and Zn-doped  $\text{CsPbBr}_3$  composite:** The  $\text{K}_2\text{SiF}_6\text{:Mn}^{4+}$  and Zn-doped  $\text{CsPbBr}_3$  powders were weighed in the mass ratio of 0.6/ 0.4 and was homogeneously dispersed in the polystyrene-toluene solution (0.1 g of polystyrene granules and 1 mL of toluene). Subsequently, 250  $\mu\text{L}$  of the dispersion was drop-casted on a quartz substrate (13 mm  $\times$  13 mm) and naturally dried for 2 hours to remove the solvent. Finally, a uniformly coated  $\text{K}_2\text{SiF}_6\text{:Mn}^{4+}$ /Zn-doped  $\text{CsPbBr}_3$  composite film-coated glass substrate was obtained.

**Fabrication of  $\text{K}_2\text{SiF}_6\text{:Mn}^{4+}$ /Zn-doped  $\text{CsPbBr}_3$  composite film-coated WLED:** A prototype white-LED device is fabricated by directly stacking the  $\text{K}_2\text{SiF}_6\text{:Mn}^{4+}$ / Zn-doped  $\text{CsPbBr}_3$  composite film coated glasses onto a commercially available blue-emitting InGaN LED chip (455 nm).

### **Characterizations.**

X-ray diffraction (XRD) patterns of pristine and Zn-doped PNCs were recorded on a Bruker DE/D8 Advance X-ray Diffractometer equipped with Cu  $K\alpha$  ( $\lambda = 1.541 \text{ \AA}$ ) radiation source operated at 60kV and 60 mA at room temperature. The samples were provided in dry powder form and scanned within the range of  $2\theta$  from 10 to 60°. The morphology of the pristine and Zn-doped PNCs was investigated from the transmission electron microscopy (TEM) and high-resolution TEM (HR-TEM) images acquired on a JEM-2100/ JEOL/ JP operated at 200 kV accelerating voltage. The 300 mesh copper Formvar/ carbon grid was dipped into the 50  $\mu\text{l}$  PNCs dispersed in 1 ml of a toluene solution and allowed to dry in ambient conditions

overnight. Inductively coupled plasma-atomic emission spectroscopy (ICP-AES) characterization was carried out on a Shimadzu ICPS-8100 twin sequential high-frequency plasma emission spectrometer. The dried samples (0.055g) were first digested in warm (2% HNO<sub>3</sub> and 1% HCl) acid solution (~95 °C, over a night) until completely dissolved forming a transparent liquid. The obtained solution was then diluted with deionized water, and the resultant solution was filtered through a syringe filter with 0.22 μm pore size before the analysis. The samples were measured under an N<sub>2</sub> atmosphere as a purging gas, ranging from 30°C to 1000 °C with a heating rate of 10 K/min. The X-ray photoelectron spectroscopy (XPS) measurement for CsPbCl<sub>3</sub> and Mn-doped CsPbCl<sub>3</sub> PNCs materials were conducted on an Ulvac PHI/X-tool spectrometer with Al Kα radiation source (1486.6 eV, 24.1W, 15kV) and a beam diameter of 100 μm×100 μm. Raman spectrum is measured using *Jobin Yvon Horiba (LABRAM HR - 800)* Micro Raman spectrometer attached with the Ar<sup>+</sup> laser (514.5 nm) as the excitation source having an output power of 1.2 μW, with a laser beam spot size of 100 μm. TA spectra for pristine and Zn-doped CsPbBr<sub>3</sub> PNCs were measured in the range of 430-600 nm at a pump wavelength of 400 nm and energy of ~5 nJ/pulse at different pump-probe delay times on a home built femtosecond transient absorption spectroscopy (fs-TA) setup based on a 1 kHz Ti: sapphire regenerative amplifier (Astrella, Coherent) with ~50 fs fundamental pulses at 805 nm. A sapphire window with a thickness of 2 mm was exposed to laser pluses at 800 nm, which produced white continuum light (WCL) ranging from 380 to 800 nm. The WCL was divided into two beams: one for probing and one for reference. The WCL pulses were detected with pump by using a 500 Hz mechanical chopper. All the TA measurements used a pump beam with a wavelength of 400 nm. The probe and reference beams were collected by two fiber spectrometers to record and calculated the TA dynamics. A series of PNCs toluene solutions were prepared by dispersing 0.025 mg of PNCs in 1 ml of toluene and used to conduct

absorption, PL, and time-resolved spectroscopy measurements. UV-Vis absorption spectra were measured in the range of 300-700 nm on a Shimadzu UV-2600 spectrometer. The steady-state fluorescence spectra (PL and PLE) were recorded using a Shimadzu RF-6000 Spectrofluorophotometer equipped with a 150 W Xe lamp as an excitation and scanning speed of 60,000 nm/min. The time-resolved decay curves of the samples were measured on a HORIBA Jobin Yvon FluoroMax-4 fluorescence spectrometer equipped with a 150 W Xe lamp as an excitation source at room temperature. The PLQY of the PNCs dispersed toluene solutions were measured by employing an integrated sphere unit attached to Shimadzu RF-6000 Spectrofluorophotometer according to the standard procedure using Toluene as a reference under ambient conditions. Electroluminescence spectra were measured on a Labsphere CdS-610 spectrometer.

**Table S1.** ICP-AES data analysis of CsPbBr<sub>3</sub>:x%Zn PNCs with different concentrations of ZnBr<sub>2</sub> (0, 20, 40, 60, and 80%)

| Doping<br>Content of<br>ZnBr <sub>2</sub> (%) | Zn content<br>(at%) |
|-----------------------------------------------|---------------------|
| 0                                             | 0                   |
| 20                                            | 2.52                |
| 40                                            | 4.56                |
| 60                                            | 7.03                |
| 80                                            | 8.94                |

**Table S2.** Band position and their assignment in the Raman spectra of CsPbBr<sub>3</sub> and Cs<sub>4</sub>PbBr<sub>6</sub>.

| Sample                            | Band position (cm <sup>-1</sup> ) | Assignment of Raman bands                                                                                                             | Ref.         |
|-----------------------------------|-----------------------------------|---------------------------------------------------------------------------------------------------------------------------------------|--------------|
| CsPbBr <sub>3</sub>               | 129.4                             | - is attributed to the transverse-optical (TO) phonon mode due to symmetric stretching vibrations of the Pb-Br bonds in the octahedra | [S1, S2]     |
|                                   | 160.7                             | - is attributed to the longitudinal-optical (LO) phonon mode due to symmetric stretching modes of Pb-Br bonds in the octahedra        | [S1, S3]     |
|                                   | 313.5                             | - is attributed to the second-order (longitudinal optical (LO)) phonon mode corresponding to the vibration of Pb-Br bond.             | [S1, S3, S4] |
| Cs <sub>4</sub> PbBr <sub>6</sub> | 114.7                             | - is attributed to the bending modes of the Pb-Br bonds in the octahedra                                                              | [S1]         |
|                                   | 130.8                             | - is attributed to the transverse-optical (TO) phonon mode due to symmetric stretching vibrations of the Pb-Br bonds in the octahedra | [S1, S2]     |
|                                   | 166.2                             | - is attributed to the longitudinal-optical (LO) phonon mode due to symmetric stretching modes of Pb-Br bonds in the octahedra        | [S1, S3]     |

**Table S3.** XPS data analysis of CsPbBr<sub>3</sub>:x%Zn PNCs with different concentrations of ZnBr<sub>2</sub> (0, 20, 40, 60, and 80%)

| Doping<br>Content of<br>ZnBr <sub>2</sub> (%) | Zn content<br>(at%) |
|-----------------------------------------------|---------------------|
| 0                                             | 0                   |
| 20                                            | 1.96                |
| 40                                            | 3.3                 |
| 60                                            | 6.8                 |
| 80                                            | 8.2                 |



**Table S4.** PLQY, decay components ( $\tau_1$  and  $\tau_2$ ), lifetime ( $\tau$ ), radiative decay rate ( $k_r$ ), nonradiative decay rate ( $k_{nr}$ ) of CsPbBr<sub>3</sub> and ZnBr<sub>2</sub> doped CsPbBr<sub>3</sub> PNCs.

| Doping<br>Content of<br>ZnBr <sub>2</sub> (%) | PLQY<br>(%) | $\tau_1$<br>(ns) | $\tau_2$<br>(ns) | Lifetime<br>( $\pm 0.1$<br>ns) | $k_r$<br>( $\pm 0.01$<br>ns <sup>-1</sup> ) | $k_{nr}$<br>( $\pm 0.01$<br>ns <sup>-1</sup> ) | $k_r/k_{nr}$<br>$\pm 0.01$ |
|-----------------------------------------------|-------------|------------------|------------------|--------------------------------|---------------------------------------------|------------------------------------------------|----------------------------|
| CsPbCl <sub>3</sub>                           | 50.1        | 1.72             | 22.67            | 13.6                           | 0.0368                                      | 0.0367                                         | 1.0041                     |
| 20 ZnBr <sub>2</sub>                          | 62.3        | 7.63             | 25.22            | 16.2                           | 0.0385                                      | 0.0233                                         | 1.653                      |
| 40 ZnBr <sub>2</sub>                          | 79.8        | 6.70             | 32.85            | 19.8                           | 0.0402                                      | 0.0102                                         | 3.9505                     |
| 60 ZnBr <sub>2</sub>                          | 98.6        | 6.55             | 34.01            | 23.3                           | 0.0424                                      | 0.00061                                        | 70.429                     |
| 80 ZnBr <sub>2</sub>                          | 54.2        | 13.07            | 24.65            | 14.5                           | 0.0375                                      | 0.0317                                         | 1.1834                     |

**Table S5.** Temperature-dependent decay lifetimes of CsPbBr<sub>3</sub> and 60% ZnBr<sub>2</sub> doped PNCs.

| Temperature<br>(K) | CsPbBr <sub>3</sub> | 60% ZnBr <sub>2</sub><br>doped PNCs |
|--------------------|---------------------|-------------------------------------|
| 10                 | 4.41                | 9.14                                |
| 50                 | 6.18                | 6.20                                |
| 100                | 6.79                | 9.67                                |
| 150                | 7.48                | 12.48                               |
| 200                | 9.40                | 14.43                               |
| 250                | 10.81               | 15.3                                |
| 300                | 11.63               | 17.56                               |
| 350                | 16.12               | 19.58                               |
| 375                | 11.87               | 24.29                               |
| 400                | 10.05               | 27.52                               |

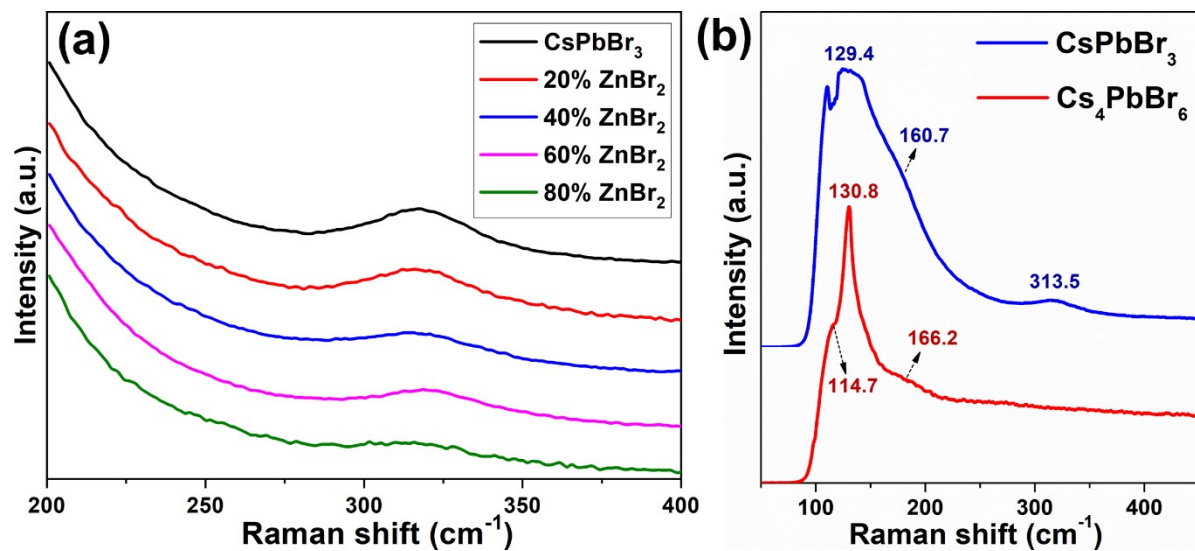

**Fig. S1.** Raman spectra of the (a)  $\text{CsPbBr}_3$  and  $\text{CsPbBr}_3$ :x%  $\text{ZnBr}_2$  (x = 0, 20, 40, 60, and 80%), (b) comparison of the Raman spectral profiles of  $\text{CsPbBr}_3$  and  $\text{Cs}_4\text{PbBr}_6$ .

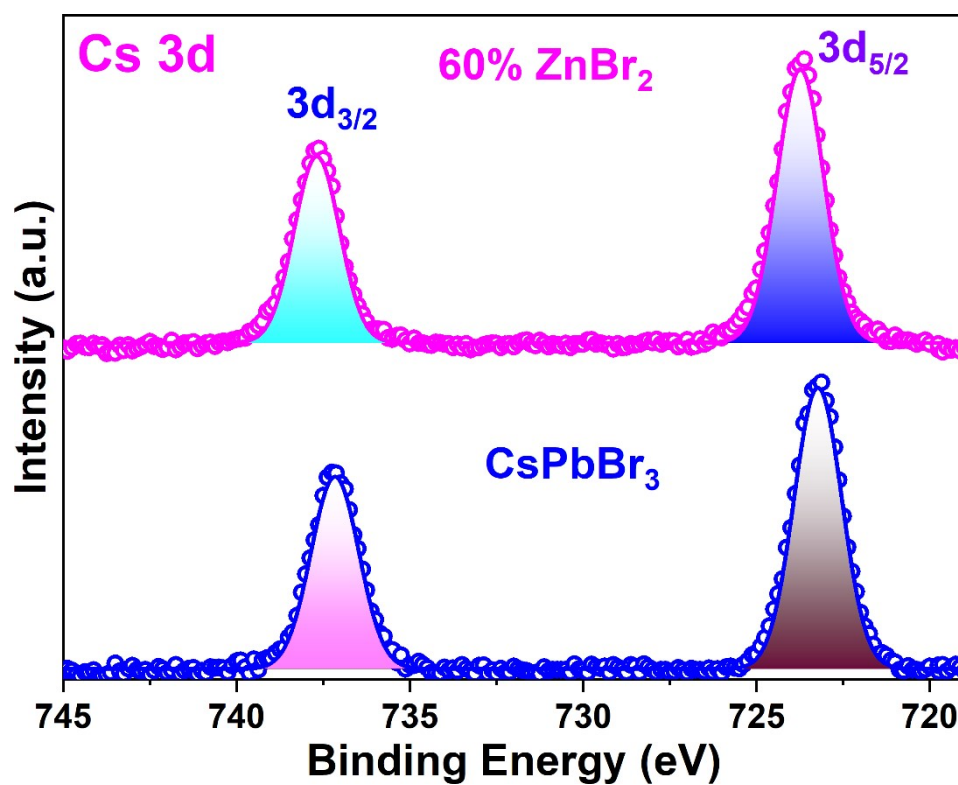

**Fig. S2.** Narrow-scan XPS spectrum of Cs ( $3d_{3/2}$ ,  $3d_{5/2}$ ) for pristine CsPbBr<sub>3</sub> and ZnBr<sub>2</sub>-doped PNCs.

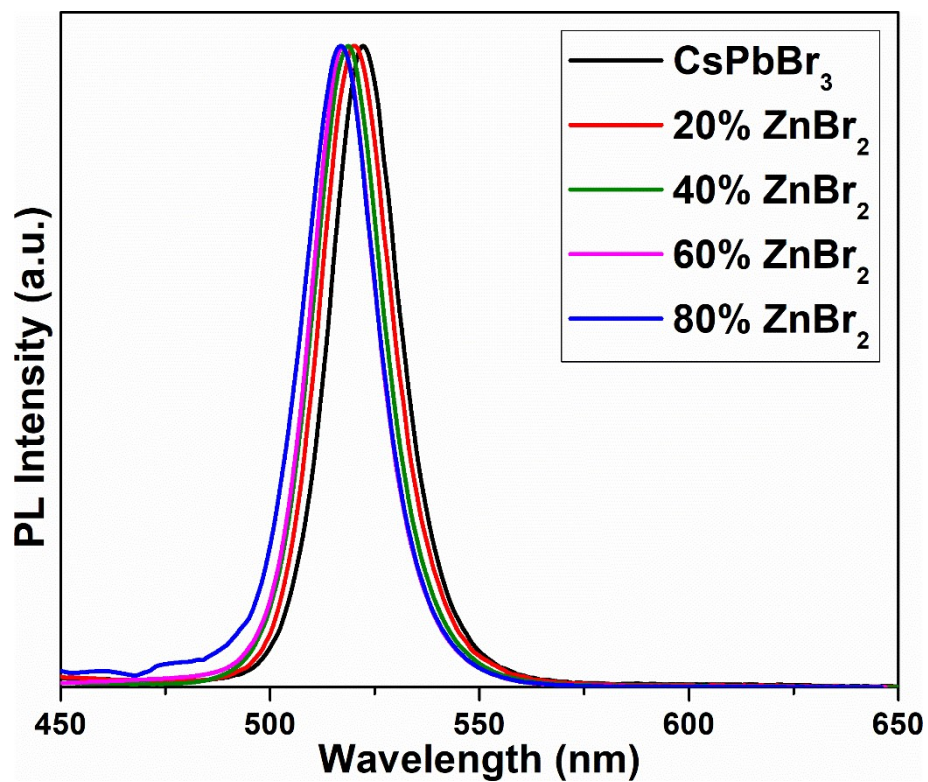

**Fig. S3.** Normalized PL spectra for pristine  $\text{CsPbBr}_3$  and  $\text{ZnBr}_2$ -doped PNCs.

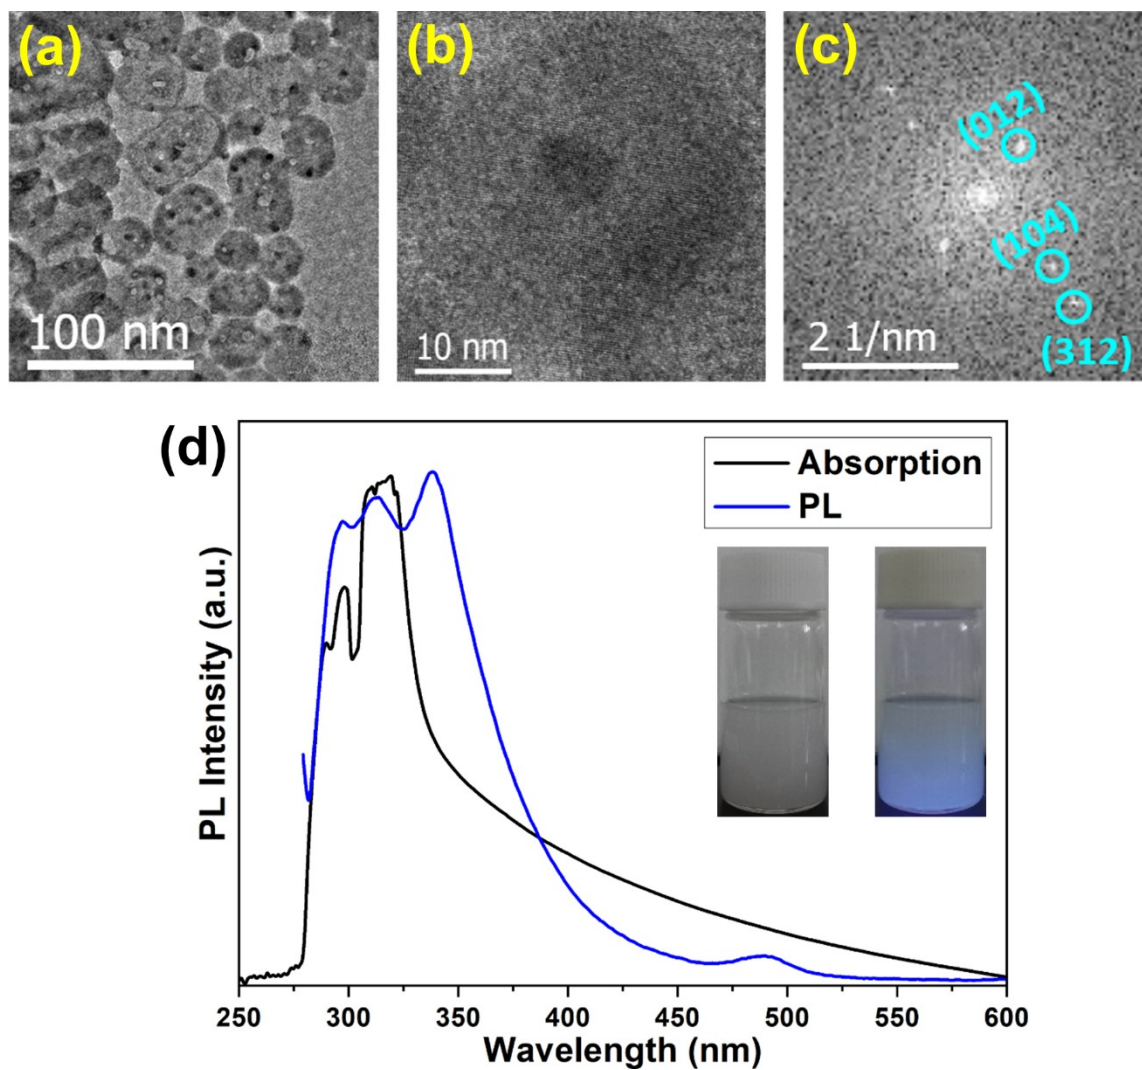

**Fig. S4.** (a) TEM, (b) HR-TEM and (c) corresponding FFT image, optical and luminescence properties of 96%  $\text{ZnBr}_2$  doped  $\text{CsPbBr}_3$  PNCs.

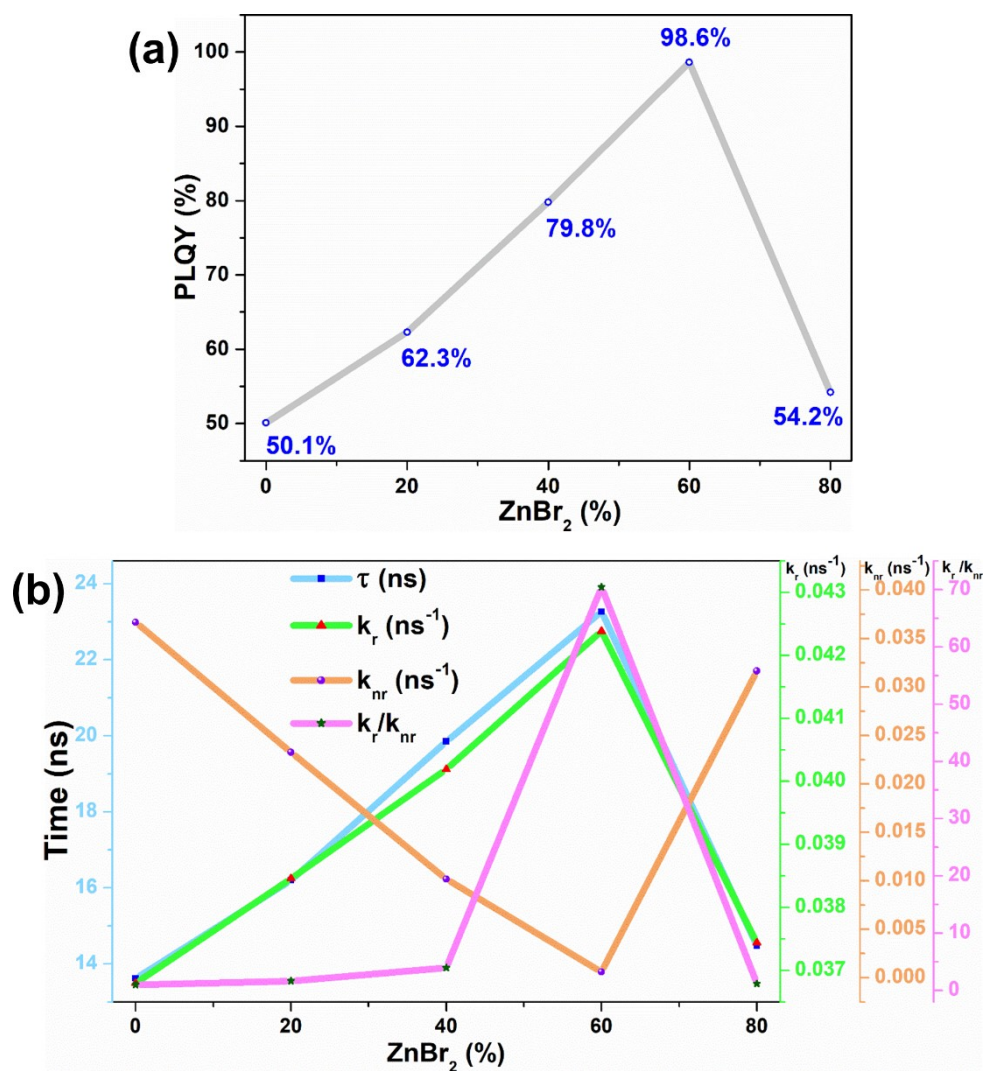

**Fig. S5.** (a) PLQY, (b) lifetime ( $\tau$ ),  $k_r$ ,  $k_{nr}$ , and  $k_r/k_{nr}$  as a function of ZnBr<sub>2</sub> doping concentration in CsPbBr<sub>3</sub> PNCs.

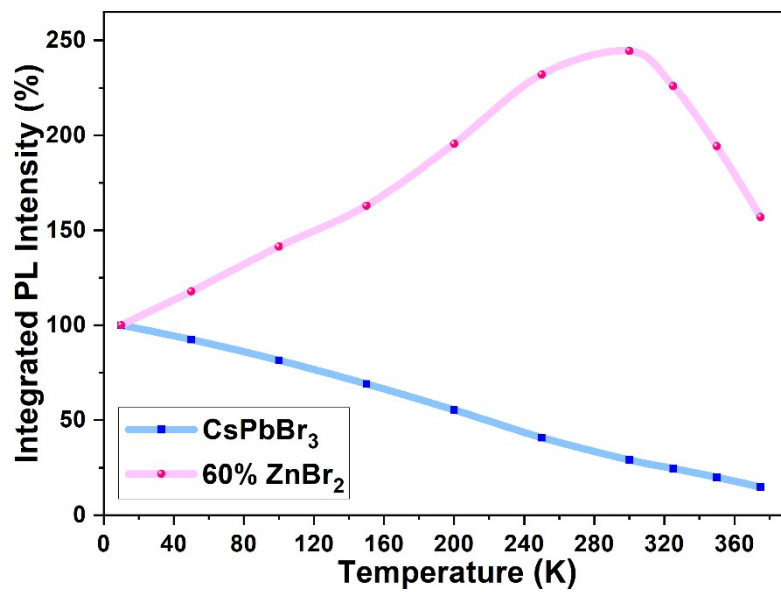

**Fig. S6.** The relationship between temperature and integrated PL intensities for both CsPbBr<sub>3</sub> and ZnBr<sub>2</sub> doped PNCs.



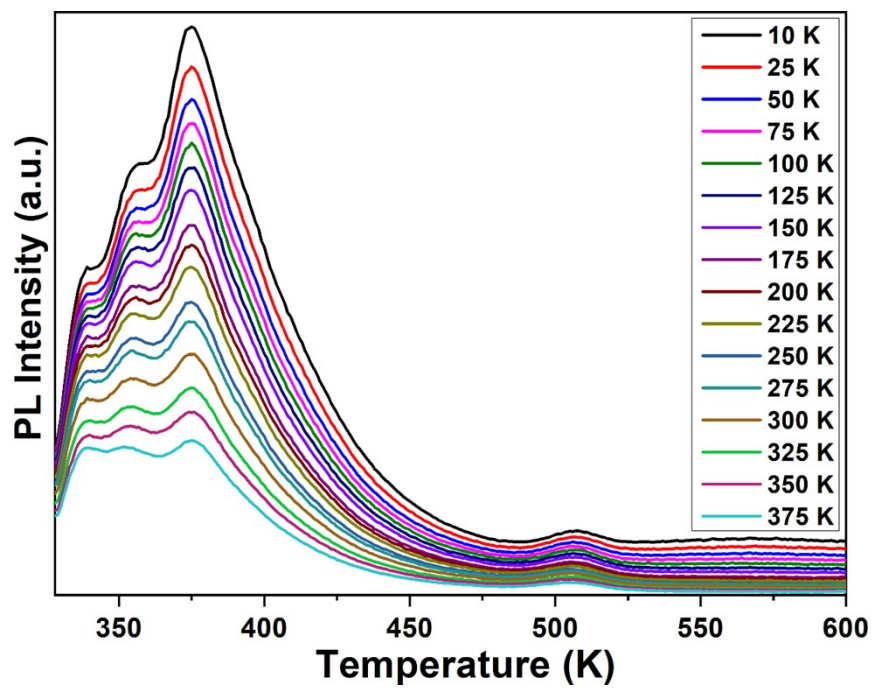

**Fig. S7.** Temperature-dependent PL spectra of fully transformed  $\text{Cs}_4\text{PbBr}_6$  PNCs after doping 96%  $\text{ZnBr}_2$  into  $\text{CsPbBr}_3$  PNCs.

### Calculation of exciton binding energy (BE):

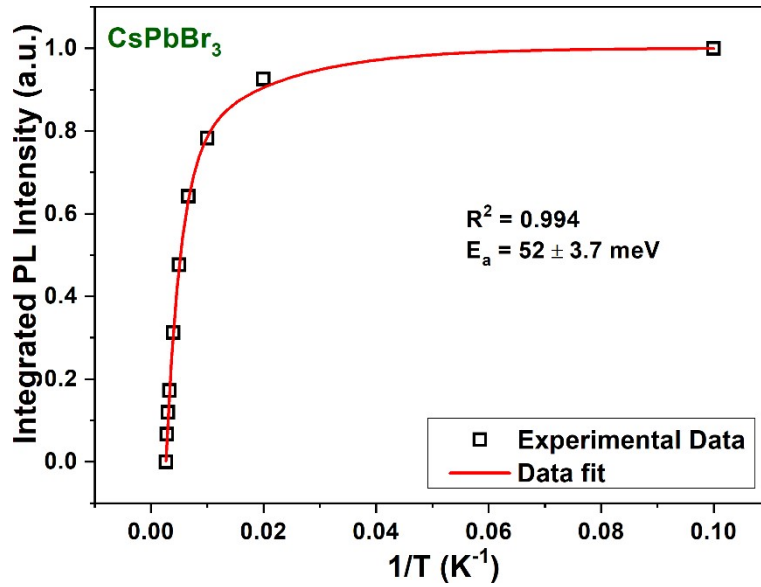

**Fig. S8.** Integrated PL intensity of pure CsPbBr<sub>3</sub> PNCs vs. inverse temperature (the solid fitting

line is Arrhenius fit for the function:

$$I_T = \frac{I_o}{1 + C \exp\left(\frac{E_a}{k_B T}\right)}$$

As seen Fig. 6a,b, the integrated PL intensities for pure CsPbBr<sub>3</sub> PNCs decreases with increasing the temperature to 375 K, indicating thermal quenching emission. In contrary, the PL intensities of ZnBr<sub>2</sub>-doped CsPbBr<sub>3</sub> increased in the same temperature range, exhibiting negative thermal quenching, owing to suppression of nonradiative carrier trapping centers and introduction of shallow energy levels facilitating radiative recombination process enabling ZnBr<sub>2</sub>-doped CsPbBr<sub>3</sub> PNCs highly luminescent. The PL intensities as a function of temperature were fitted as shown in Fig. S8 for pure CsPbBr<sub>3</sub> PNCs, by employing Arrhenius equation [S5, S6]:

$$I_T = \frac{I_o}{1 + C \exp\left(\frac{E_a}{k_B T}\right)}, \quad (S1)$$

, where  $I_o$  is the initial emission intensity at 0 K,  $I_T$  is the emission intensity at different temperatures,  $C$  is a proportionality constant, and  $k_B$  is the Boltzmann constant ( $8.62 \times 10^{-5}$  eV K<sup>-1</sup>).  $E_a$  is derived from the integrated PL intensity vs. inverse temperature plots shown in Fig. 8a,b. The best curve fit provided  $E_a$  values of  $52 \pm 3.7$  meV for CsPbBr<sub>3</sub> PNCs.

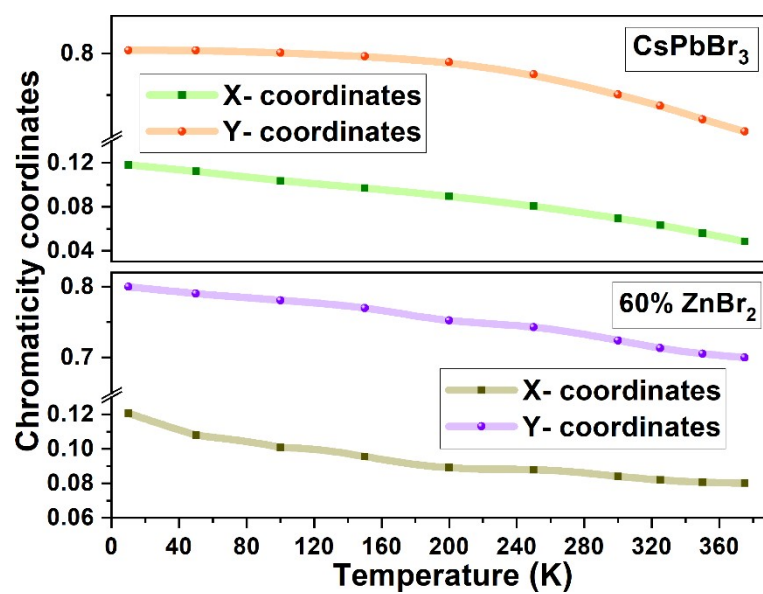

**Fig. S9.** Relation between color coordinates of pristine and 60%  $\text{ZnBr}_2$  doped PNCs at various temperatures.

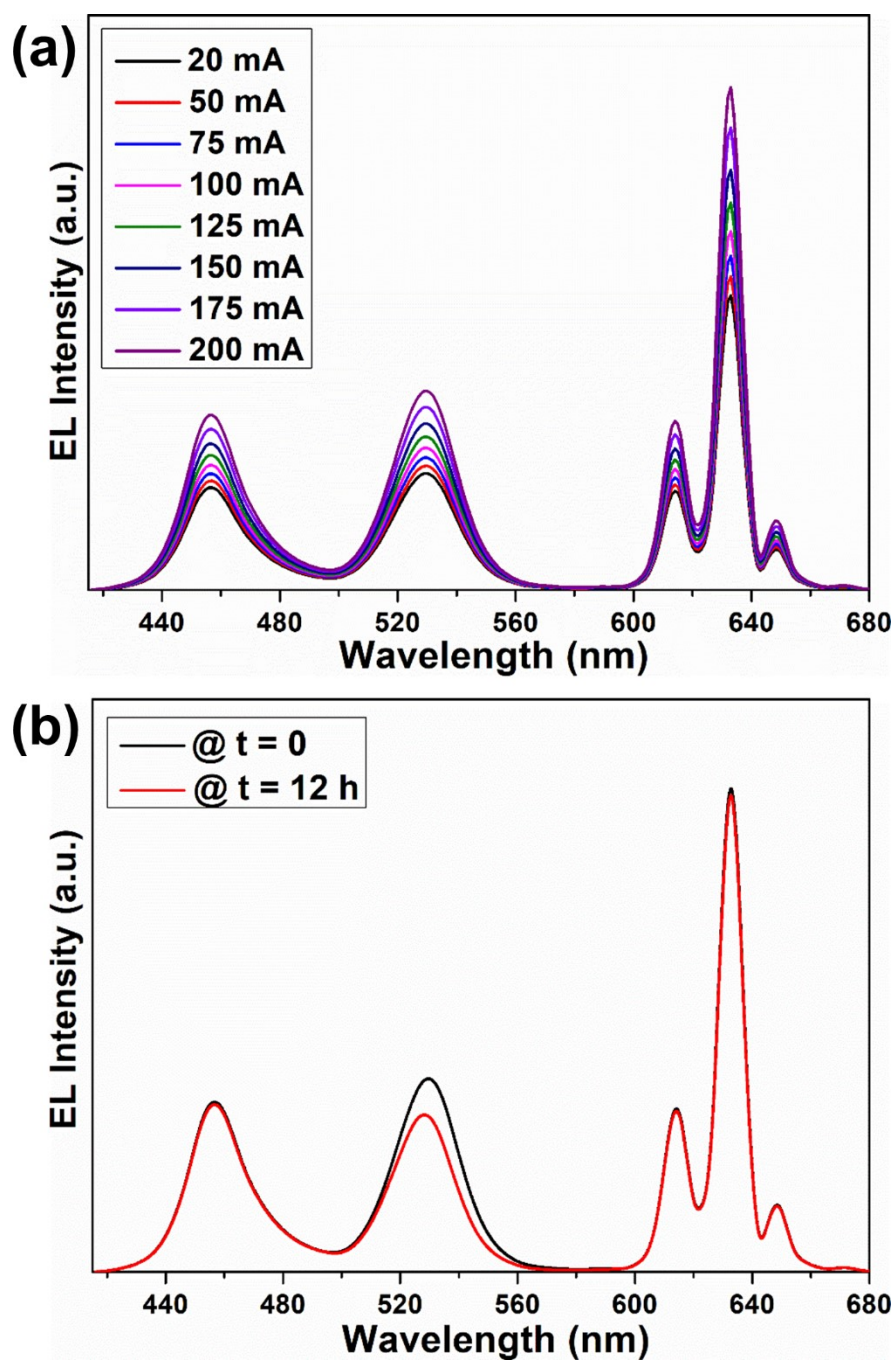

**Fig. S10.** The EL spectra were measured for the designed WLED device at (a) different operating currents (20-200 mA), and (b) time intervals (0 and 12 h).

## References

- [S1] Z. Zhao, M. Zhong, W. Zhou, Y. Peng, Y. Yin, D. Tang, B. Zou, *J. Phys. Chem. C*, 2019, **123**, 25349–25358.
- [S2] J.H. Cha, J. H. Han, W. Yin, C. Park, Y. Park, T.K. Ahn, J.H. Cho, D.Y. Jung, *J. Phys. Chem. Lett.*, 2017, **8**, 565–570.
- [S3] Z. Qin, S. Dai, V.G. Hadjiev, C. Wang, L. Xie, Y. Ni, C. Wu, G. Yang, S. Chen, L. Deng, Q. Yu, G. Feng, Z. Wang, J. Bao, *Chem. Mater.*, 2019, **31**, 9098–9104.
- [S4] J.I. Jana, R. Muydinov, P. Rosado, H. Mirhosseini, M. Chugh, O. Nazarenko, D.N. Dirin, D. Heinrich, M.R. Wagner, T.D. Kuhne, B. Szyszka, M.V. Kovalenko, A. Hoffmann, *Phys. Chem. Chem. Phys.*, 2020, **22**, 5604–5614.
- [S5] V. Naresh, T. Jang, Y. Pang, N. Lee, *Nanoscale*, 2022, **14**, 17789.
- [S6] A. Singh, P. Dey, A. Kumari, M.K. Sikdar, P.K. Sahoo, R. Das, T. Maiti, *Phys. Chem. Chem. Phys.*, 2022, **24**, 4065.
